# Supplementary material for: An investigation into the role of chronic Schistosoma mansoni infection on Human Papillomavirus (HPV) vaccine induced protective responses
Source: PLoS Negl Trop Dis. 2019 Aug 26;13(8):e0007704. doi: 10.1371/journal.pntd.0007704 (PMC6730949; doi:10.1371/journal.pntd.0007704)
Supplement: S2 Table — (XLSX) [file pntd.0007704.s003.xlsx]

## Sheet: Sheet1
	KATOKATZ EPG
Weeks	Schisto-Infected			Schisto/PZQ
0	0	0	0	0	0	0	0
4	120	53.3	33.3	0	0	0	6.7
5	80	73.3	306.7	2	13.3	33.3	20
6	246.7	80	140	140	60	60	46.7
7	800	293.3	320	73.3	86.7	100	66.7
8	546.7	286.7	260	273.3	220	160	160
9	280	246.7	120	100	213.3	60	113.3
10	540	233.3	473.3	180	53.3	193.3	73.3
11	980	340	486.7	240	60	80	120
12	726.7	200	106.7	186.7	66.7	320	60
13	453.3	193.3	226.7	340	46.7	160	60
14	413.3	246.7	866.7	200	140	193.3	186.7
15	266.7	140	160	0	0	0	0
16	100	180	460	0	0	0	0
17	333.3	240	133.3	0	0	0	0
18	240	40	106.7	0	6.7	20	0
19	286.7	106.7	313.3	20	20	46.7	20
20	253.3	166.7	260	20	40	20	0
21	280	240	93.3	0	0	6.7	33.3
22	206.7	346.7	480	6.7	0	6.7	26.7
23	560	200	286.7	13.3	0	0	6.7
24	106.7	240	100	0	13.3	20	60
25	260	200	200	0	0	0	20
26	140	240	300	0	20	0	20
27	160	460	80	6.7	46.7	6.7	20
28	320	200	240	6.7	0	6.7	6.7
29	26.7	280	100	0	6.7	6.7	0
30	73.3	253.3	93.3	6.7	20	6.7	6.7
31	313.3	100	326.7	6.7	0	6.7	0
32	40	160	220	13.3	6.7	0	0
33	220	86.7	126.7	6.7	6.7	6.7	13.3
34	133.3	273.3	66.7	13.3	20	6.7	13.3
35	386.7	120	173.3	0	6.7	20	6.7
