# Supplementary material for: An investigation into the role of chronic Schistosoma mansoni infection on Human Papillomavirus (HPV) vaccine induced protective responses
Source: PLoS Negl Trop Dis. 2019 Aug 26;13(8):e0007704. doi: 10.1371/journal.pntd.0007704 (PMC6730949; doi:10.1371/journal.pntd.0007704)
Supplement: S4 Table — (XLSX) [file pntd.0007704.s005.xlsx]

## Sheet: Sheet1
	IgG ELISA OD
	Schisto-infected+HPV			Schisto/PZQ+HPVA			HPV-only
0	0.219	0.1005	0.105	0.111	0.1605	0.1705	0.371	0.0615	0.1075
4	0.9555	0.951	0.932	0.8635	0.8065	0.6995	0.881	1.0815	1.1645
6	1.004	0.9865	0.94	1.0025	1.235	1.07	1.2485	1.145	1.0985
8	0.6835	0.694	0.688	0.7285	1.081	1.1985	1.1825	0.999	0.991
